# Supplementary material for: A novel dicationic phenoxaphosphino-modified Xantphos-type ligand—a unique ligand specifically designed for a high activity, selectivity and recyclability
Source: Royal Society of Chemistry journal article supplement (doi:10.1039/b209486j), 2002-01-01
Supplement: b209486j.doc [file b209486j.doc]

**Experimental details " A novel dicationic phenoxaphosphino-modified Xantphos-type ligand - a unique ligand specifically designed for a high activity, selectivity and recyclability"**

**Synthesis of Ligand 1**

**2,7-di-5-bromopentan-1-one-9,9-dimethylxanthene** At 0 C 24.9 g of AlCl3 (187 mmol) was added slowly to a stirred solution of 17 g of 9,9-dimethylxanthene (81 mmol) and 25 mL of 5-bromovalericacid chloride (187 mmol; 2.3 equivalents) in 250 mL of CH2Cl2. After overnight stirring the reaction mixture was poured into 100 mL of icewater and extracted with 3 x 100 mL of CH2Cl2. Subsequently, the organic layer was dried over MgSO4. The solvents were removed *in vacuo* and the resulting dark green solid was purified by flash column chromatography over silica (eluent: CH2Cl2). Yield 39 g of a yellow/green solid (90%) that was used without further purification. 1H NMR (CDCl3):  = 8.10 (d, 4J(H,H) = 1.8 Hz, 2H), 7.83 (dd, 3J(H,H) = 8.7 Hz, 4J(H,H) = 2.1 Hz, 2H), 7.12 (d, 3J(H,H) = 8.4 Hz, 2H), 3.46 (t, 3J(H,H) = 6.6 Hz, 4H), 3.00 (t, 3J(H,H) = 6.9 Hz), 1.93 (m, 8H), 1.70 (s, 6H).

**2,7-di-5-bromopentyl-9,9-dimethylxanthene** To a stirred suspension of 1.3 g InCl3 ( 5.9 mmol) and 27.6 mL of chlorodimethylsilane (4.8 eq., 245 mmol) in 80 mL of CH2Cl2 is added 27.2 g of 2,7-di-5-bromopentan-1-one-9,9-dimethylxanthene (51 mmol) in 80 mL of CH2Cl2. The reaction is followed by GC-MS and IR and is quenched by addition of 100 mL of water after complete reduction of the ketone functionalities (~ 4 h reaction time). Next, the mixture is extracted with 3 x 80 mL of CH2Cl2. Subsequently, the organic layer was dried over MgSO4. The solvents were removed in vacuo and the resulting solid was purified by flash column chromatography (eluent: hexanes). Yield: 22 g of a slightly yellow compound (86%) that was used without further purification. 1H NMR (CDCl3):  = 7.18 (d, 4J(H,H) = 1.8 Hz, 2H), 6.99 (dd, 3J(H,H) = 8.4 Hz, 4J(H,H) = 2.1 Hz, 2H), 6.94 (d, 3J(H,H) = 7.8 Hz, 2H), 3.41 (t, 3J(H,H) = 6.6 Hz, 4H), 2.60 (t, 3J(H,H) = 7.8 Hz, 4H), 1.89 (m, 4H), 1.66 (m, 4H), 1.61 (s, 6H), 1.49 (m, 4H). GC-MS (m/z, rel. intensity): 508 (M+, 8), 493 (100), 413 (20), 371 (9), 356 (14), 276 (14), 221 (22), 207 (27), 131 (18), 55 (22).

**4,5-dibromo-2,7-di-5-bromopentyl-9,9-dimethylxanthene** To an ice-cooled solution of 13.5 g of 2,7-di-5-bromopentyl-9,9-dimethylxanthene (26.6 mmol) in 130 mL of CH2Cl2 is added dropwise 4.9 mL of Br2 (3.6 eq., 95.0 mmol) in 4.9 mL of hexane. The reaction mixture is warmed to room temperature and stirred overnight. Next the excess of Br2 is quenched with 100 mL of an aqueous NaSO3 solution, the mixture is extracted with 3 x 80 mL of CH2Cl2. Subsequently, the organic layer was dried over MgSO4. The solvents were removed in vacuo and the resulting solid was purified by flash column chromatography (eluent: CH2Cl2). Yield: 15.9 g of a yellow solid (89.6 %), that was used without further purification. 1H NMR (CDCl3):  = 7.28 (s, 2H), 7.11 (s, 2H), 3.4 (t, 3J(H,H) = 6.6 Hz, 4H), 2.57 (t, 3J(H,H) = 7.5 Hz, 4H), 1.88 (m, 4H), 1.59 (s, 6H), 1.59 - 1.47 (m, 4H).

**2,7-di-5-bromopentyl-9,9-dimethyl-4,5-di(2,8-dimethyl-10-phenoxaphosphino)xanthene (2)** At -78 C 2.2 mL of n-butyllithium (2.5 M in hexanes, 5.5 mmol) was added to a stirred solution of 1.6 g of 4,5-dibromo-2,7-di-5-bromopentyl-9,9-dimethylxanthene (2.4 mmol). The resulting solution was stirred for 30 min. at -78 °. Subsequently, a suspension of 1.5 g of 2,8-dimethyl-10-chloro-phenoxaphosphine (5.7 mmol) in 15 mL of toluene was added dropwise. The reaction mixture was slowly warmed to room temperature and stirred overnight. Next the diethylether was removed *in vacuo* and the mixture was diluted with 40 mL of CH2Cl2 and hydrolyzed with 10 mL of a 10% aqueous HCl solution. The water layer was removed and the organic layer was dried over MgSO4. The solvents were removed *in vacuo* and the resulting yellow/white solid was crystallized from 2-propanol/toluene. Yield: 1.1 g of white crystals (48 %) being a mixture of 40% monochloro-monobromo,- and 60% dibromosubstituted ligand. 31P{1H} NMR (CDCl3): = -70.51. 1H NMR (CDCl3):  = 7.94 (bd, 3J(P,H) = 5.5 Hz, 4 H), 7.19 (dd, 3J(H,H) = 8.0 Hz, 4J(H,H) = 1.5 Hz, 4H), 7.11 (d, 3J(H,H) = 8.5 Hz, 4H), 7.06(d, 4J(H,H) = 1.5 Hz, 2H), 6.51 (d, 4J(H,H) = 1.5 Hz, 2H), 3.47 (t, 3J(H,H) = 6.5 Hz, 0.8H; CH2-Cl), 3.45 (t, 3J(H,H) = 6.5 Hz, 3.2H; CH2-Br), 2.40 (t, 3J(H,H) = 7.5 Hz, 4H), 2.35 (s, 12H), 1.79 (q, 3J(H,H) = 7.5 Hz, 4H), 1.54 (s, 6H), 1.43 (m, 4H), 1.32 (m, 4H). 13C{1H} NMR (CDCl3):  =154.38 (s), 150.88 (t, 10.3 Hz), 136.92 (s), 135.77 (vt, 21.7 Hz), 133.64 (s), 132.91 (t, 5.2 Hz), 131.76 (s), 131.69 (s), 130.05 (s), 127.11 (s), 118.30 (bs), 117.58 (s), 35.10 (s), 34.68 (s), 33.91 (s), 32.83 (s), 32.58 (s), 30.27 (s), 27.66 (s), 20.85 (s).

**2,7-di(5-(3-methylimidazolium)pentyl)-9,9-dimethyl-4,5-di(2,8-dimethyl-10-phenoxaphosphino)xanthene hexafluorophosphate(1)** To a stirred solution of 490 mg of 2,7-di-5-bromopentyl-9,9-dimethyl-4,5-bis(2,8-dimethyl-10-phenoxaphosphino)xanthene (0.52 mmol) in 30 mL of an acetonitrile/toluene mixture (1:1) is added 0.1 mL of 1-methylimidazole (2.7 eq., 1.4 mmol). The mixture is heated to 80 °C and stirred for 8 days to obtain complete conversion. Next, the solvents were removed *in vacuo* and the resulting solid was purified by precipitation from toluene/acetonitrile. Yield: 250 mg of a white solid (46%). 31P{1H} NMR (CD2Cl2): = -69.03. 1H NMR (CD2Cl2):  = 10.45 (s, 2H), 7.98 (bd, 3J(P,H) = 5.4 Hz, 4 H), 7.3 - 7.1 (m, 14 H), 6.51 (bs, 2H), 4.22 (t, 3J(H,H) = 7.5 Hz, 4H), 4.01 (s, 3H), 2.40 (m, 4H), 2.36 (s, 12H), 1.84 (q, 3J(H,H) = 7.5 Hz, 4H), 1.53 (s, 6H), 1.48 (m, 4H), 1.27 (m, 4H). 13C{1H} NMR (CD2Cl2):  = 156.17 (s), 152.72 (t, 20.5 Hz), 139.17 (s), 137.52 (t, 22.0 Hz), 135.24 (s), 133.83 (s), 133.36 (s), 132.36 (s), 129.33 (s), 128.86 (vt, unresolved), 125.34 (s), 123.83 (s), 120.05 (s), 119.51 (s), 51.87 (s), 38.58 (s), 36.93 (s), 36.64 (s), 34.12 (s), 32.47 (s), 32.07 (s), 27.49 (s), 22.53 (s). To a suspension of 150 mg of 2,7-di(5-(3-methylimidazolium)pentyl)-9,9-dimethyl-4,5-di(2,8-dimethyl-10-phenoxaphosphino)xanthene bromide (0.14 mmol) in H2O was added 78 mg of KPF6 (3 eq., 42 mmol). After overnight stirring the solvent is removed *in vacuo* and 15 mL of CH2Cl2 is added. After filtration of the salts (KBr) the CH2Cl2 is removed *in vacuo* yielding a white powder (yield: 130 mg, 77%) that is NMR-pure. 31P{1H} NMR (CD3CN): = 61.42 (heptet, 1J(P,F; PF6-) = 706 Hz), -66.02 (s). 19F{1H} NMR (CD3CN): = -67.80 (d, 1J(P,F) = 704 Hz). 1H NMR (CD3CN):  = 8.38 (bs, 2H), 7.97 (dd, 3J(P,H) = 6.6 Hz, 4J(H,H) = 1.4 Hz, 4H), 7.34 (m, 4H), 7.28 (dd, 3J(H,H) = 8.1 Hz, 4J(H,H) = 2.1 Hz, 4H), 7.24 (d, 4J(H,H) = 2H), 7.15 (d, 3J(H,H) = 8.1 Hz, 4H), 6.45 (d, 4J(H,H) = 1.5 Hz, 2H), 4.06 (t, 3J(H,H) = 7.2 Hz, 4H), 3.83 (s, 6H), 2.38 (t, 3J(H,H) = 7.8 Hz, 4H), 2.36 (s, 6H), 1.76 (m, 4H), 1.51 (s, 6H), 1.42 (m, 4H), 1.21 (m, 4H). 13C{1H} NMR (DMSO-d6):  = 154.15 (s), 150.45 (t, 22.6 Hz), 137.67, 137.15 (s), 135.49 (t, 21.4 Hz), 133.64 (s), 132.85 (s), 131.21 (s), 130.52 (s), 128.41 (s), 126.73 (vt, unresolved), 124.31 (s), 122.91 (s), 118.21 (s), 117.75 (s), 49.56 (s), 36.09 (s), 34.52 (s), 31.79 (s), 30.38 (s), 29.59 (s), 25.27 (s), 19.95 (s).
